# Supplementary material for: Phospholamban Is Downregulated by pVHL-Mediated Degradation through Oxidative Stress in Failing Heart
Source: Int J Mol Sci. 2017 Oct 25;18(11):2232. doi: 10.3390/ijms18112232 (PMC5713202; doi:10.3390/ijms18112232)
Supplement: Supplementary file 1 [file ijms-18-02232-s001.pdf]

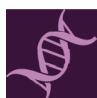

# Phospholamban Is Downregulated by pVHL-Mediated Degradation through Oxidative Stress in Failing Heart

Shunichi Yokoe and Michio Asahi \*

## Supplementary Materials

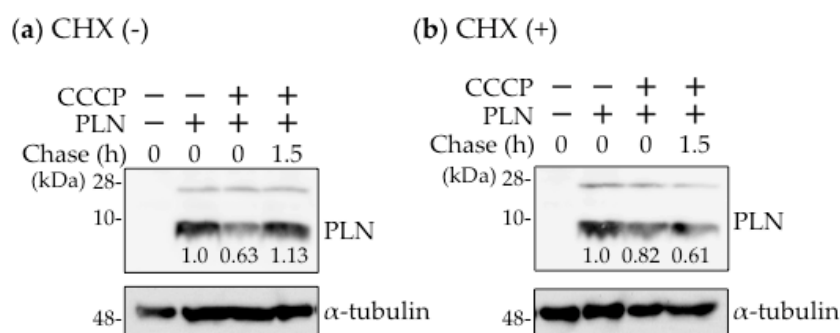

**Supplementary Figure S1.** (a,b) 20  $\mu$ M carbonylcyanide m-chlorophenylhydrazone (CCCP)-treated HEK293 cells were washed to remove CCCP away, and chased for 1.5 h with (b) or without (a) 50  $\mu$ g/mL cycloheximide (CHX).

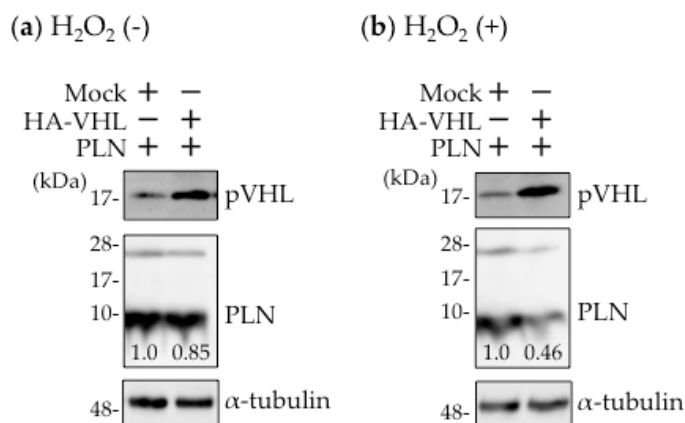

**Supplementary Figure S2.** (a,b) VHL overexpression using HA-VHL expression vector was performed in PLN-transfected HEK293 cells, compared with HA-mock overexpressed cells. The cells were harvested with (b) or without (a) 100  $\mu$ M H<sub>2</sub>O<sub>2</sub> treatment for 1 h.

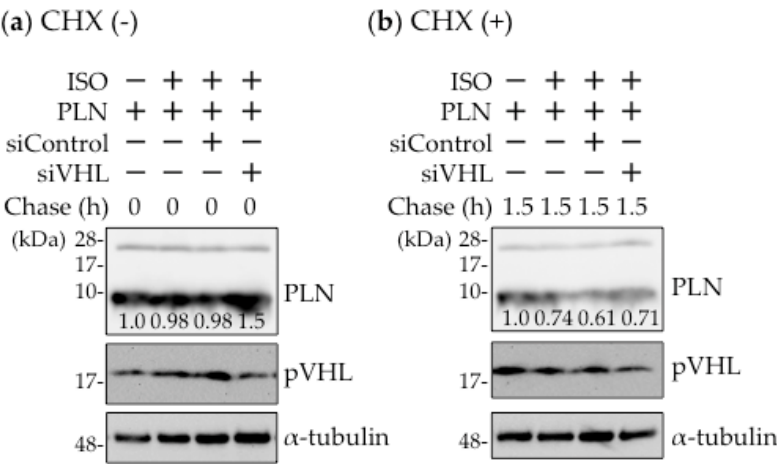

**Supplementary Figure S3. (a,b)** *VHL* silencing was performed in PLN-transfected HEK293 cells, compared with negative siRNA control (siControl). 1 μM isoproterenol (ISO)-treated HEK293 cells were washed to remove ISO away, and chased for 1.5 h with (b) or without (a) 50 μg/mL cycloheximide (CHX).
